# Supplementary material
Source: PubMed Central journal article supplement (PMC8883409)
Supplement: NIHMS1781878-supplement-Supplementary_Material.pdf [file NIHMS1781878-supplement-Supplementary_Material.pdf]

*Supplementary Material for:*

# **Simulated Driving in the Epilepsy Monitoring Unit: Effects of Seizure Type, Consciousness and Motor Impairment**

Avisha Kumar<sup>1</sup>, Reese Martin<sup>1</sup>, William Chen<sup>1</sup>, Andrew Bauerschmidt<sup>1</sup>, Mark W. Youngblood<sup>1</sup>, Courtney Cunningham<sup>1</sup>, Yang Si<sup>1</sup>, Cel Ezeani<sup>1</sup>, Zachary Kratochvil<sup>1</sup>, Jared Bronen<sup>1</sup>, James Thomson, Katherine Riordan, Ji Yeoun Yoo<sup>1</sup>, Romina Shirka<sup>1</sup>, Louis Manganas<sup>1</sup>, Heinz Krestel<sup>1,4</sup>, Lawrence J. Hirsch<sup>1</sup>, and Hal Blumenfeld<sup>1,2,3</sup>

Departments of <sup>1</sup>Neurology, <sup>2</sup>Neuroscience, <sup>3</sup>Neurosurgery, Yale University School of Medicine, 333 Cedar Street, New Haven, Connecticut 06520, USA

<sup>4</sup>Epilepsy Center of Frankfurt, Rhine-Main, University Hospital Frankfurt, Center for Personalized Translational Epilepsy Research, Goethe University, Frankfurt, Germany

**Supplementary Table 1: Patient Clinical and Demographic Information**

| Patient Number | Gender | Age at participation (years) | Seizure Type                    | Seizure Duration(s) | Driving Impaired | Consciousness/Responsiveness Impaired? | Motor Impaired | Epilepsy Diagnosis and Localization                 | Seizure Frequency |
|----------------|--------|------------------------------|---------------------------------|---------------------|------------------|----------------------------------------|----------------|-----------------------------------------------------|-------------------|
| 1              | Male   | 40                           | Focal                           | 10                  | N                | U                                      | N              | Focal epilepsy, right temporal-parietal heterotopia | 1/mo              |
| "              | "      | "                            | "                               | 8                   | "                | "                                      | "              | "                                                   | "                 |
| "              | "      | "                            | "                               | 10                  | "                | "                                      | "              | "                                                   | "                 |
| "              | "      | "                            | "                               | 20                  | "                | "                                      | "              | "                                                   | "                 |
| "              | "      | "                            | "                               | 16                  | "                | "                                      | "              | "                                                   | "                 |
| 2              | Male   | 41                           | Focal to bilateral tonic-clonic | 25                  | Y                | Y                                      | Y              | Focal epilepsy, unlocalized                         | multiple Daily    |
| "              | "      | "                            | "                               | 30                  | "                | "                                      | "              | "                                                   | "                 |
| 3              | Female | 55                           | Focal                           | 289                 | Y                | Y                                      | Y              | Focal epilepsy, right hemisphere                    | multiple weekly   |
| 4              | Male   | 43                           | Focal                           | 45                  | N                | N                                      | N              | Focal epilepsy, right frontal cavernous angioma     | multiple monthly  |
| 5              | Male   | 52                           | Focal                           | 74                  | Y                | Y                                      | N              | Focal epilepsy, right fronto-temporal               | near daily        |
| 6              | Male   | 9                            | GNM (GSWD)                      | 10                  | N                | N                                      | N              | Generalized epilepsy                                | 1/few years       |
| "              | "      | "                            | "                               | 7                   | "                | "                                      | "              | "                                                   | "                 |
| "              | "      | "                            | "                               | 10                  | "                | U                                      | "              | "                                                   | "                 |
| 7              | Female | 39                           | Focal                           | 39                  | N                | U                                      | N              | Focal epilepsy, multifocal                          | 1-2/week          |
| "              | "      | "                            | "                               | 221                 | Y                | Y                                      | N              | "                                                   | "                 |
| "              | "      | "                            | "                               | 15                  | "                | "                                      | "              | "                                                   | "                 |
| 8              | Female | 13                           | GNM (GSWD)                      | 11                  | Y                | U                                      | N              | Generalized atypical absence epilepsy               | multiple daily    |
| "              | "      | "                            | "                               | 11                  | N                | N                                      | N              | "                                                   | "                 |
| "              | "      | "                            | "                               | 17                  | "                | "                                      | "              | "                                                   | "                 |

**Supplementary Table 1: Patient Clinical and Demographic Information (continued)**

| Patient Number | Gender | Age at participation (years) | Seizure Type | Seizure Duration(s) | Driving Impaired | Consciousness/Responsiveness Impaired? | Motor Impaired | Epilepsy Diagnosis and Localization                | Seizure Frequency |
|----------------|--------|------------------------------|--------------|---------------------|------------------|----------------------------------------|----------------|----------------------------------------------------|-------------------|
| "              | "      | "                            | "            | 29                  | "                | "                                      | "              | "                                                  | "                 |
| 9              | Male   | 21                           | Focal        | 2                   | Y                | U                                      | Y              | Focal epilepsy, unlocalized                        | 1/1-2 mo          |
| 10             | Male   | 59                           | Focal        | 105                 | Y                | Y                                      | Y              | Focal epilepsy, left or right fronto-temporal      | 4-6/month         |
| 11             | Male   | 24                           | Focal        | 2                   | N                | U                                      | N              | Focal epilepsy, right central                      | multiple daily    |
| 12             | Male   | 29                           | Focal        | 15                  | N                | U                                      | N              | Focal epilepsy, post traumatic, left hemisphere    | multiple monthly  |
| "              | "      | "                            | "            | 13                  | "                | "                                      | "              | "                                                  | "                 |
| 13             | Male   | 17                           | Focal        | 108                 | Y                | Y                                      | Y              | Focal epilepsy, post traumatic, left hemisphere    | multiple daily    |
| 14             | Male   | 20                           | Myoclonic    | 1                   | Y                | U                                      | Y              | Generalized, juvenile myoclonic epilepsy           | 1/few months      |
| 15             | Female | 37                           | Focal        | 12                  | Y                | Y                                      | Y              | Focal epilepsy, right heterotopia, multifocal      | multiple weekly   |
| "              | "      | "                            | "            | 10                  | "                | "                                      | "              | "                                                  | "                 |
| 16             | Male   | 26                           | Focal        | 65                  | N                | N                                      | N              | Focal epilepsy, unlocalized                        | 1/1-2 weeks       |
| 17             | Female | 17                           | Focal        | 1377                | Y                | Y                                      | N              | Focal epilepsy, bifrontal                          | multiple daily    |
| 18             | Male   | 19                           | Focal        | 49                  | Y                | Y                                      | Y              | Focal epilepsy, unlocalized                        | 3/day             |
| 19             | Male   | 23                           | GNM (GSWD)   | 24                  | N                | U                                      | N              | Generalized epilepsy                               | Multiple daily    |
| "              | "      | "                            | "            | 29                  | "                | N                                      | "              | "                                                  | "                 |
| "              | "      | "                            | "            | 21                  | "                | "                                      | "              | "                                                  | "                 |
| "              | "      | "                            | "            | 22                  | "                | U                                      | "              | "                                                  | "                 |
| "              | "      | "                            | "            | 22                  | "                | "                                      | "              | "                                                  | "                 |
| 20             | Male   | 10                           | Focal        | 38                  | Y                | Y                                      | Y              | Focal epilepsy, left hemisphere cavernous angiomas | daily seizures    |
| 21             | Female | 28                           | Focal        | 39                  | N                | N                                      | N              | Focal epilepsy, right frontoparietal infarct       | 1/mo              |
| 22             | Male   | 26                           | Focal        | 39                  | N                | N                                      | N              | Focal epilepsy, left frontal                       | 1-2/mo            |

**Supplementary Table 1: Patient Clinical and Demographic Information (continued)**

| Patient Number | Gender | Age at participation (years) | Seizure Type                    | Seizure Duration(s) | Driving Impaired | Consciousness/Responsiveness Impaired? | Motor Impaired | Epilepsy Diagnosis and Localization           | Seizure Frequency |
|----------------|--------|------------------------------|---------------------------------|---------------------|------------------|----------------------------------------|----------------|-----------------------------------------------|-------------------|
| 23             | Male   | 36                           | Focal                           | 37                  | N                | N                                      | N              | Focal epilepsy, unlocalized                   | 4/year            |
| 24             | Male   | 25                           | Focal                           | -                   | N                | N                                      | N              | Focal epilepsy, post-encephalitic, multifocal | N/A               |
| 25             | Male   | 41                           | Focal to bilateral tonic-clonic | 484                 | Y                | Y                                      | Y              | Focal epilepsy, right fronto-temporal         | 3-4/week          |
| 26             | Male   | 17                           | GNM (GSWD)                      | 3                   | N                | N                                      | N              | Generalized epilepsy                          | 1/2-3 weeks       |
| "              | "      | "                            | "                               | 4                   | "                | "                                      | "              | "                                             | "                 |
| "              | "      | "                            | "                               | 3                   | "                | "                                      | "              | "                                             | "                 |
| "              | "      | "                            | "                               | 3                   | "                | "                                      | "              | "                                             | "                 |
| 27             | Male   | 57                           | Focal to bilateral tonic-clonic | 8                   | Y                | Y                                      | Y              | Focal epilepsy, frontal, non-lateralized      | daily seizures    |
| 28             | Female | 24                           | GNM (GSWD)                      | 88                  | N                | N                                      | N              | Generalized epilepsy                          | unclear           |
| 29             | Female | 21                           | GNM (GSWD)                      | 4                   | N                | N                                      | N              | Generalized, juvenile absence epilepsy        | 1/few months      |
| 30             | Female | 16                           | GNM (GSWD)                      | 23                  | N                | N                                      | N              | Generalized, absence epilepsy                 | unclear           |

GNM – Generalized Non-Motor

GSWD – Generalized Spike Wave Discharge

N – No

Y – Yes

U - Unknown
